# Supplementary material
Source: PubMed Central journal article supplement (PMC545903)
Supplement: mbc_E04-07-0544_1.pdf [file mbc_E04-07-0544_1.pdf]

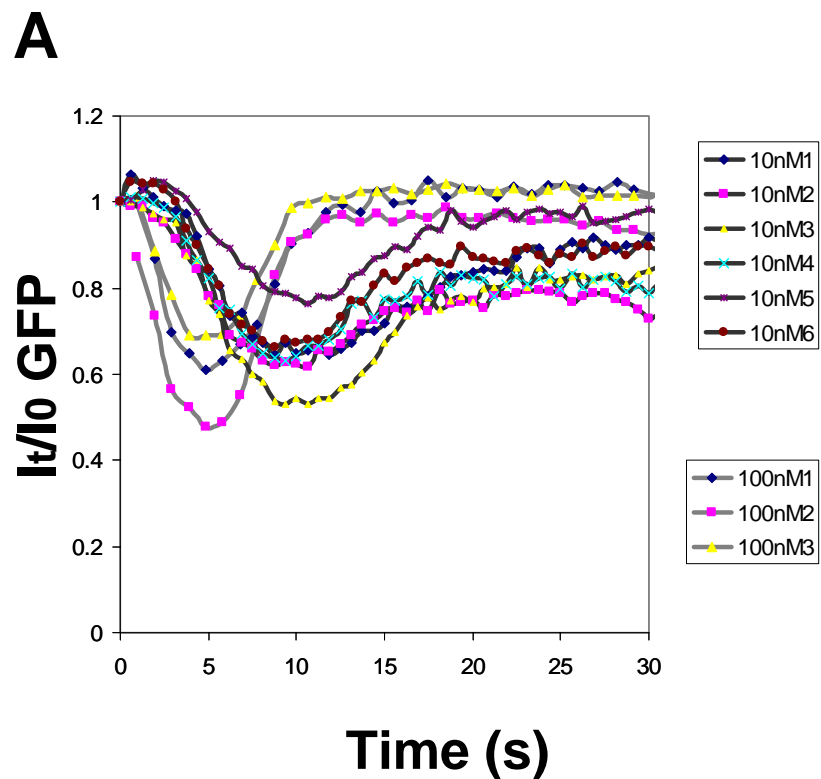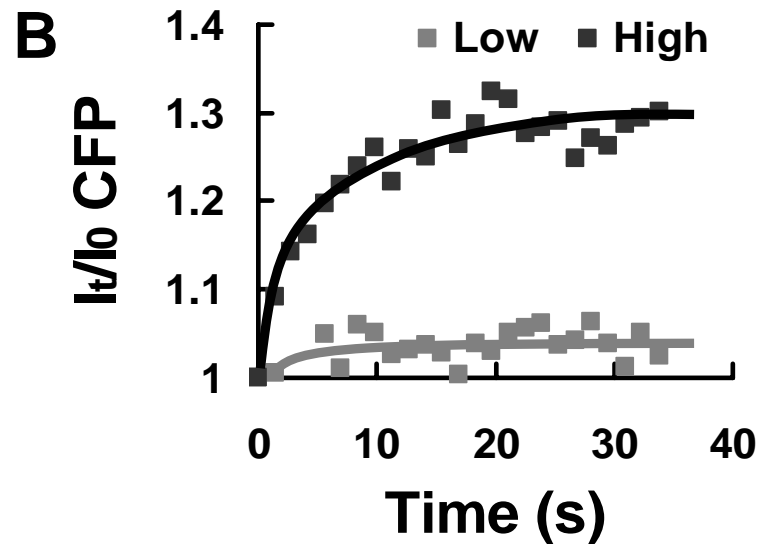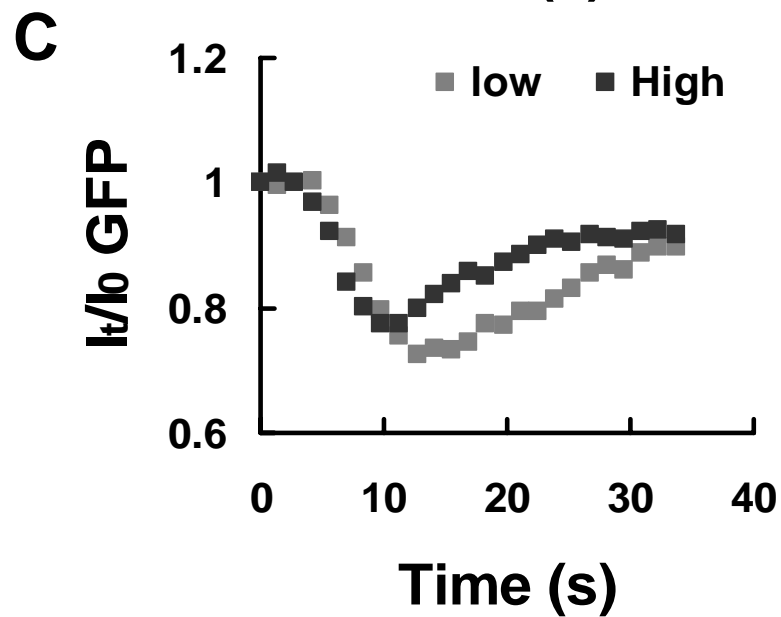

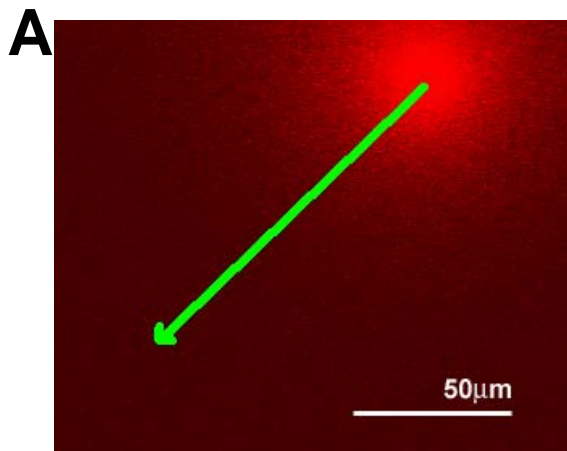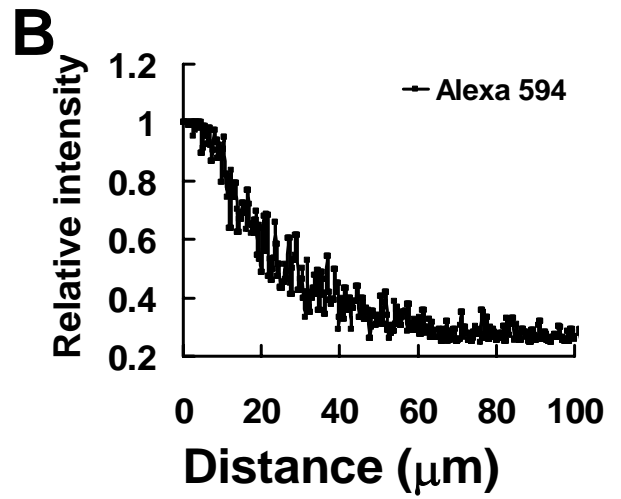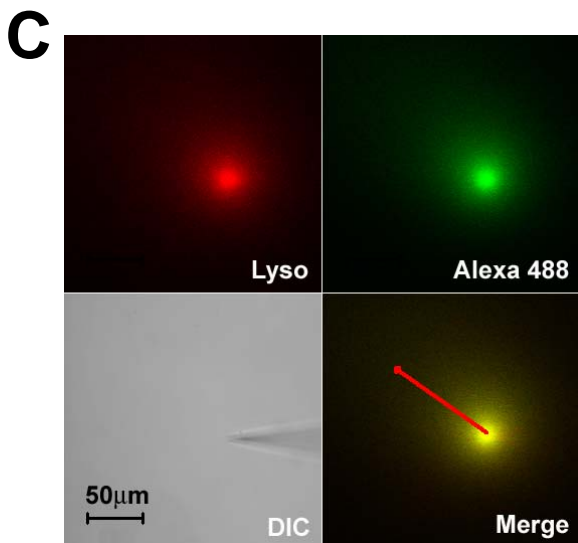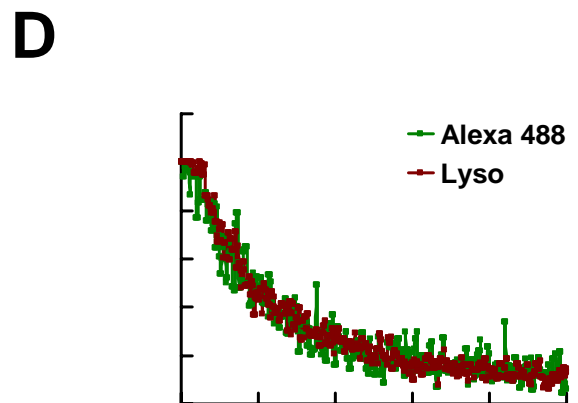

**A**

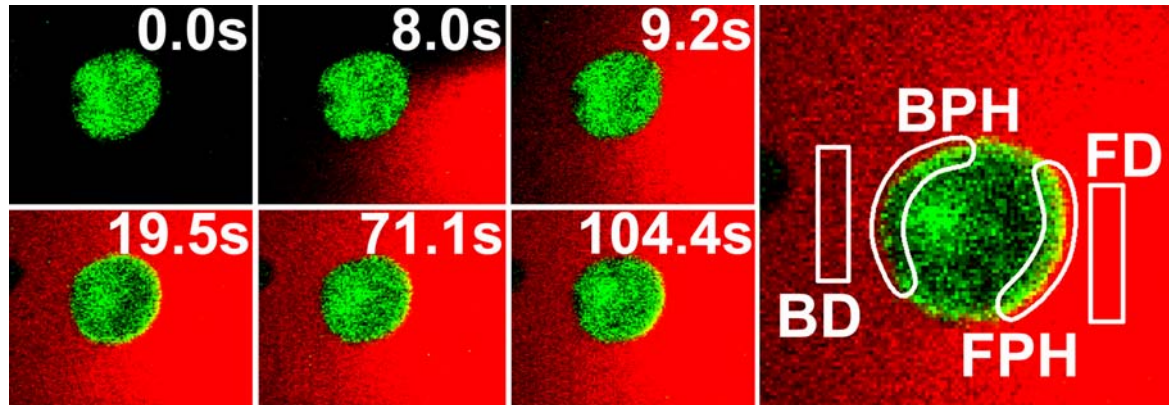

**B**

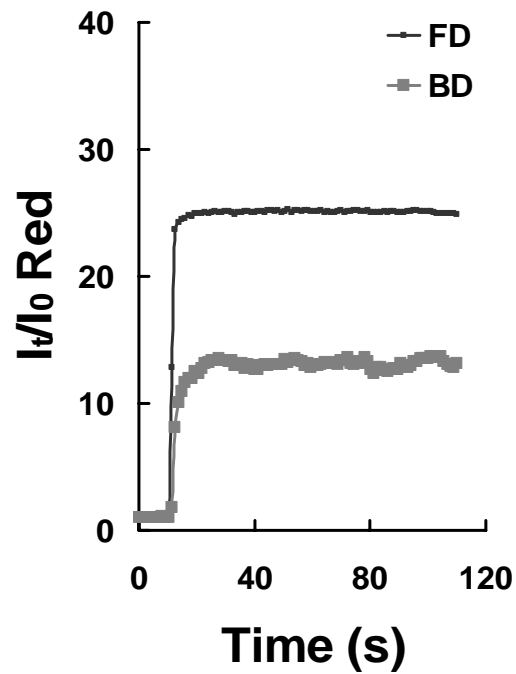

**C**

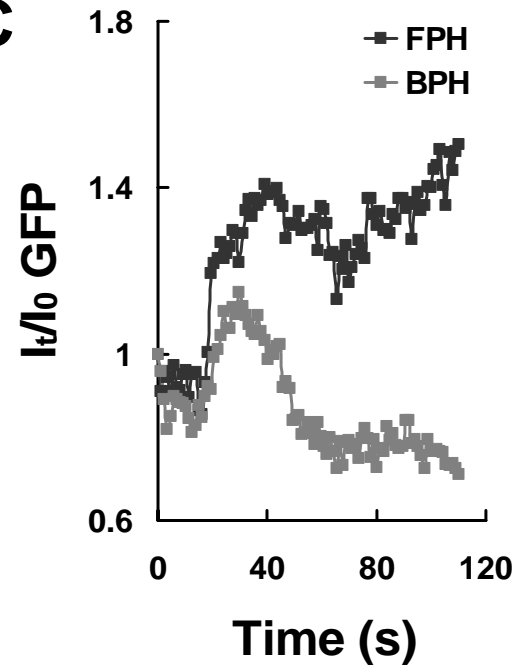

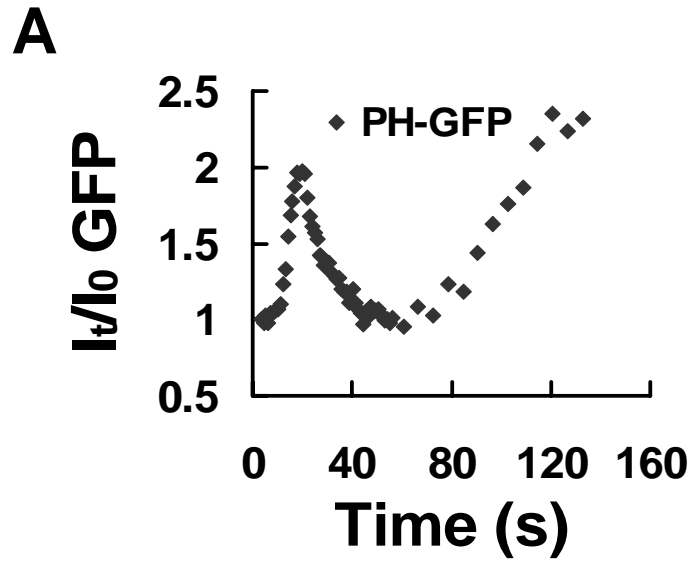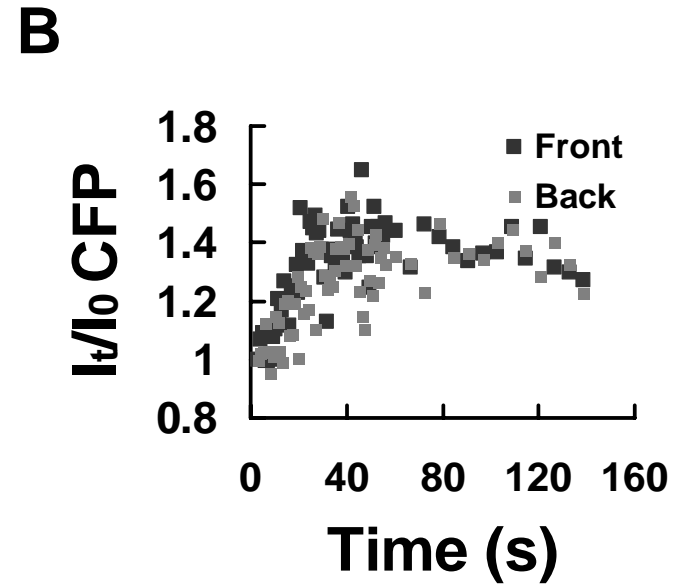

Table 1. cAMP-dose-dependent  $T_{\max}$  and  $R_{\max}$  of transient  $\text{PH}_{\text{Crac}}$ -GFP response in a uniform field of cAMP.

cAMP induces a transient membrane translocation of  $\text{PH}_{\text{Crac}}$ -GFP from the cytosol. As shown in Fig. S1, temporal changes in the amount of cytosolic  $\text{PH}_{\text{Crac}}$ -GFP were measured and normalized, and  $T_{\max}$  and  $R_{\max}$  were determined for individual cells, as shown below. Means and SD for each concentration were calculated, and are listed below and shown in Fig. 3A and 3B.

| 100 nM | $T_{\max}$ (s) | $R_{\max}$ | 10 nM | $T_{\max}$ (s) | $R_{\max}$ | 1 nM | $T_{\max}$ (s) | $R_{\max}$ |
|--------|----------------|------------|-------|----------------|------------|------|----------------|------------|
| 1      | 7.18           | 0.742251   | 1     | 11.87          | 0.616195   | 1    | 12.92          | 0.610976   |
| 2      | 6.63           | 0.809759   | 2     | 10.62          | 0.522209   | 2    | 14.28          | 0.795412   |
| 3      | 7.18           | 0.738178   | 3     | 9.37           | 0.443503   | 3    | 13.6           | 0.730963   |
| 4      | 9.14           | 0.689611   | 4     | 9.37           | 0.571927   | 4    | 12.92          | 0.768168   |
| 5      | 8.49           | 0.725649   | 5     | 10             | 0.717982   | 5    | 14.28          | 0.646853   |
| 6      | 7.84           | 0.716701   | 6     | 8.75           | 0.620189   | 6    | 12.92          | 0.773035   |
| 7      | 7.18           | 0.782763   | 7     | 15.41          | 0.486842   | 7    | 13.6           | 0.821126   |
| 8      | 10.45          | 0.694245   | 8     | 16.64          | 0.505875   | 8    | 10.46          | 0.843822   |
| 9      | 4.86           | 0.610934   | 9     | 14.17          | 0.448624   | 9    | 10.46          | 0.690028   |
| 10     | 4.86           | 0.479146   | 10    | 13.56          | 0.472686   | 10   | 10.46          | 0.750927   |
| 11     | 4.86           | 0.690384   | 11    | 13.56          | 0.483301   | 11   | 9.59           | 0.80457    |
| 12     | 6.08           | 0.754848   | 12    | 11.71          | 0.623408   | 12   | 10.46          | 0.841153   |
| 13     | 6.08           | 0.535478   | 13    | 9.59           | 0.723928   | 13   | 11.04          | 0.57083    |
| 14     | 4.35           | 0.613966   | 14    | 8.85           | 0.699673   | 14   | 10.25          | 0.531828   |
| 15     | 4.35           | 0.674688   | 15    | 8.85           | 0.681977   | 15   | 10.25          | 0.577943   |
| 16     | 6.08           | 0.585849   | 16    | 10.32          | 0.732493   | 16   | 9.46           | 0.490334   |
| 17     | 6.8            | 0.551714   | 17    | 9.59           | 0.724613   | 17   | 11.04          | 0.573259   |
| 18     | 8.5            | 0.582319   | 18    | 10.24          | 0.586385   | 18   | 11.04          | 0.570115   |
| 19     | 7.65           | 0.62531    | 19    | 8.04           | 0.594666   | 19   | 11.04          | 0.579336   |
| 20     | 9.35           | 0.512887   | 20    | 8.77           | 0.820632   | 20   | 11.04          | 0.572386   |
| 21     | 7.65           | 0.600273   | 21    | 7.31           | 0.851704   | 21   | 8.88           | 0.682623   |
| 22     | 7.65           | 0.600273   | 22    | 9.51           | 0.628353   | 22   | 9.68           | 0.737232   |
| 23     | 7.65           | 0.724033   | 23    | 9.51           | 0.67268    | 23   | 8.88           | 0.749522   |
| 24     | 6.8            | 0.624862   | 24    | 7.31           | 0.745667   | 24   | 9.68           | 0.738248   |
| 25     | 7.65           | 0.659453   | 25    | 8.04           | 0.7265     |      |                |            |
| 26     | 7.65           | 0.681144   | 26    | 8.04           | 0.693522   |      |                |            |
| 27     | 6.8            | 0.728815   | 27    | 8.04           | 0.633352   |      |                |            |
| 28     | 6.8            | 0.67465    | 28    | 6.58           | 0.797532   |      |                |            |
| 29     | 7.65           | 0.727049   |       |                |            |      |                |            |

| Mean  | $T_{\max}$ (s) | SD   | Mean  | $R_{\max}$ | SD       |
|-------|----------------|------|-------|------------|----------|
| 100nM | 7.04           | 1.47 | 100nM | 0.659904   | 0.082655 |
| 10nM  | 10.13          | 2.5  | 10nM  | 0.636658   | 0.114306 |
| 1nM   | 11.2           | 1.67 | 1nM   | 0.685445   | 0.10791  |

**FigS1.** Concentration-dependent transient responses of PH<sub>Crac</sub>-GFP in uniformly applied cAMP stimulations.

(A) Relative intensity of PH<sub>Crac</sub>-GFP transiently decreases in cytosol of a cell upon a uniform stimulation. Responses to 100 nM (3 cells) and to 10 nM (6 cells) are shown. PH<sub>Crac</sub>-GFP expressing cells were differentiated for 5 hrs and treated with Latrunculin before being stimulated with cAMP. Translocation responses were normalized as the ratio of the mean GFP intensity at any given time ( $I_t$ ) to that of time 0 ( $I_0$ ) when cAMP was added. The lowest point indicates the value of  $T_{max}$  and  $R_{max}$  for each cell response; these values are shown in Table 1. (B) G-protein activation shown as the CFP intensity changes on the membrane in one cell stimulated with a low dose (1nM, gray) and then a high dose (100 nM, black). (C) PH<sub>Crac</sub>-GFP response in one cell stimulated with a low dose (1nM, gray) and then a high dose (100 nM, black).

**FigS2.** Quantitatively measuring gradients of extracellular cAMP.

(A) An image of a circular cAMP gradient. A microinjector was linked to a Femtojet with constant pressure ( $P_c=70$  and  $P_i=70$ ), which injects a constant and small volume of mixture of Alexa 594 and cAMP solution into a one-well cell chamber with total buffer volume of 6 ml. When the micropipette is moved from one position to another, a gradient remains almost constant (Video9.mov.). (B) A normalized intensity change of red fluorescence along the thick green line in FigS2.A shows an exponential decay curve as a function of the distance ( $\mu\text{m}$ ). The steepness of the gradient is defined as,  $(I_f - I_b)/I_b$ , where  $I_f$  is the intensity at the front of a cell and  $I_b$  is the intensity at the back. A cell is about 10  $\mu\text{m}$  in diameter, therefore, the gradient across a cell residing in the range from 30 to 80  $\mu\text{m}$  to the position of a micropipette is estimated at about 20%. (C). Images of a circular gradient of a mixture of two fluorescence dyes that differ to a similar degree in their molecular masses as do cAMP (MW 329.2) and Alexa594 (MW 758.79). A micropipette filled with a mixture of LysoTracker Red DND-99 (MW 399.025, red) and Alexa fluor 488 (MW 643.41, green) generated a stable gradient. Fluorescence images of LysoTracker Red DND-99 (red) or Alexa fluor 488 (green) of the gradient were recorded simultaneously in two channels. Channel one: excitation is 543 nm and emissions from 585-615 nm to specifically monitor LysoTracker Red DND-99; Channel two: excitation

is 488 nm and emissions from 505-530 to specifically monitor Alexa fluor 488. (D) A comparison a comparison of the diffusion concentration profiles for two dyes, LysoTracker Red DND-99 and Alexa fluor 488,. Quantitative measurement of the gradient along the line starting from the position of the dispensing micropipette are shown as intensities of LysoTracker Red DND-99 (red) and Alxea fluor 488 (green) as a function of the distance ( $\mu\text{m}$ ). Two curves (red and green) overlap, indicating that difference in their molecular masses and structure had little effect on the profile of the gradient under our experimental condition.

**FigS3.** The biphasic dynamics of  $\text{PH}_{\text{Crac}}$ -GFP translocation in a cell suddenly exposed to a static cAMP gradient (another example of experiments shown in Fig. 6).

(A) A PH cell (green) is suddenly exposed to a cAMP gradient at 8.0 s (red). Membrane translocation of  $\text{PH}_{\text{Crac}}$ -GFP occurs everywhere in the inner cell membrane (19.5s). Membrane-bound  $\text{PH}_{\text{Crac}}$ -GFP declined in both the front and back of the cell (71.1s), and a second increase only occurred in the front side (104.4s). Front (FD) and back (BD) regions used to evaluate changes of Alexa 594 intensity as a measure of cAMP concentration. FPH and BPH were selected membrane regions used for monitoring the response of  $\text{PH}_{\text{Crac}}$ -GFP translocation to the front and the back of the cell relative to the cAMP gradient. (B). Rapid generation of a stable cAMP gradient. (C) Dynamic changes in  $\text{PH}_{\text{Crac}}$ -GFP membrane translocation at the front (FPH) and the back side (BPH) of the cell.

**FigS4.** G-protein activation following sudden exposure to a steady cAMP gradient (another example of the experiments shown in Fig. 7).

(A) Dynamics of  $\text{PH}_{\text{Crac}}$ -GFP membrane association in the front of a nearby PH cell. (B) G-protein activation in the front (black) and back (gray) regions of a G cell, shown as the temporal changes in ratio of CFP/YFP.

**Table 1.** cAMP-dose-dependent  $T_{\text{max}}$  and  $R_{\text{max}}$  of transient  $\text{PH}_{\text{Crac}}$ -GFP responses from multiple cells in a uniform field of cAMP
